# Supplementary material
Source: Springer Nature journal article supplement (https://www.springermedizin.de/resource/supplementary/13550_2013_137_MOESM2_ESM.pdf/9687676)

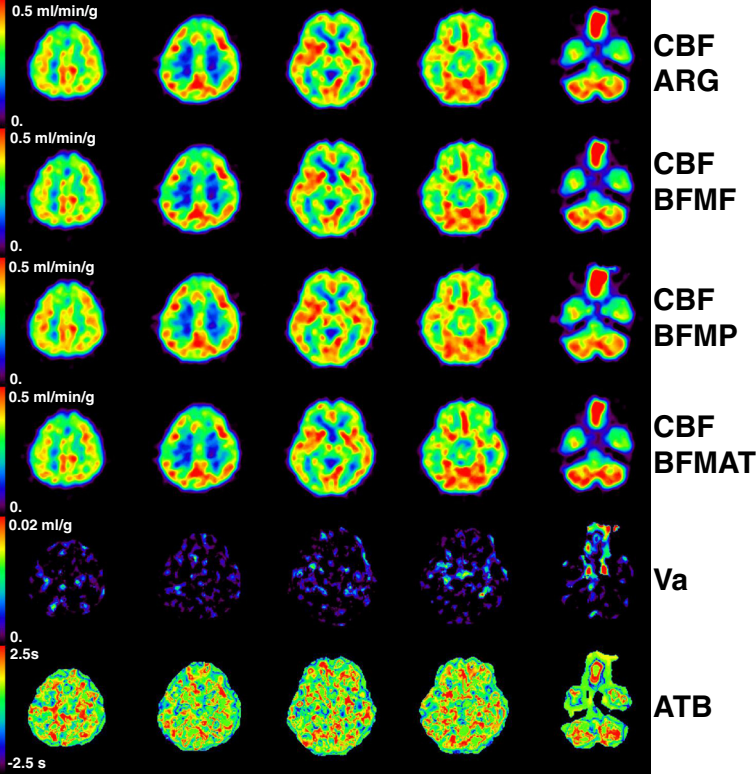

Supplement: MOESM2 [file 9687676]
